# Supplementary material for: Isosakuranetin-5-O-rutinoside: A New Flavanone with Antidepressant Activity Isolated from Salvia elegans Vahl
Source: PubMed Central journal article supplement (PMC6270368; doi:10.3390/molecules181113260), 2013-10-25

# Supplementary Materials

Figure S1.  $^1\text{H-NMR}$  ( $\text{CD}_3\text{OD}$ , 400MHz) compound 2.

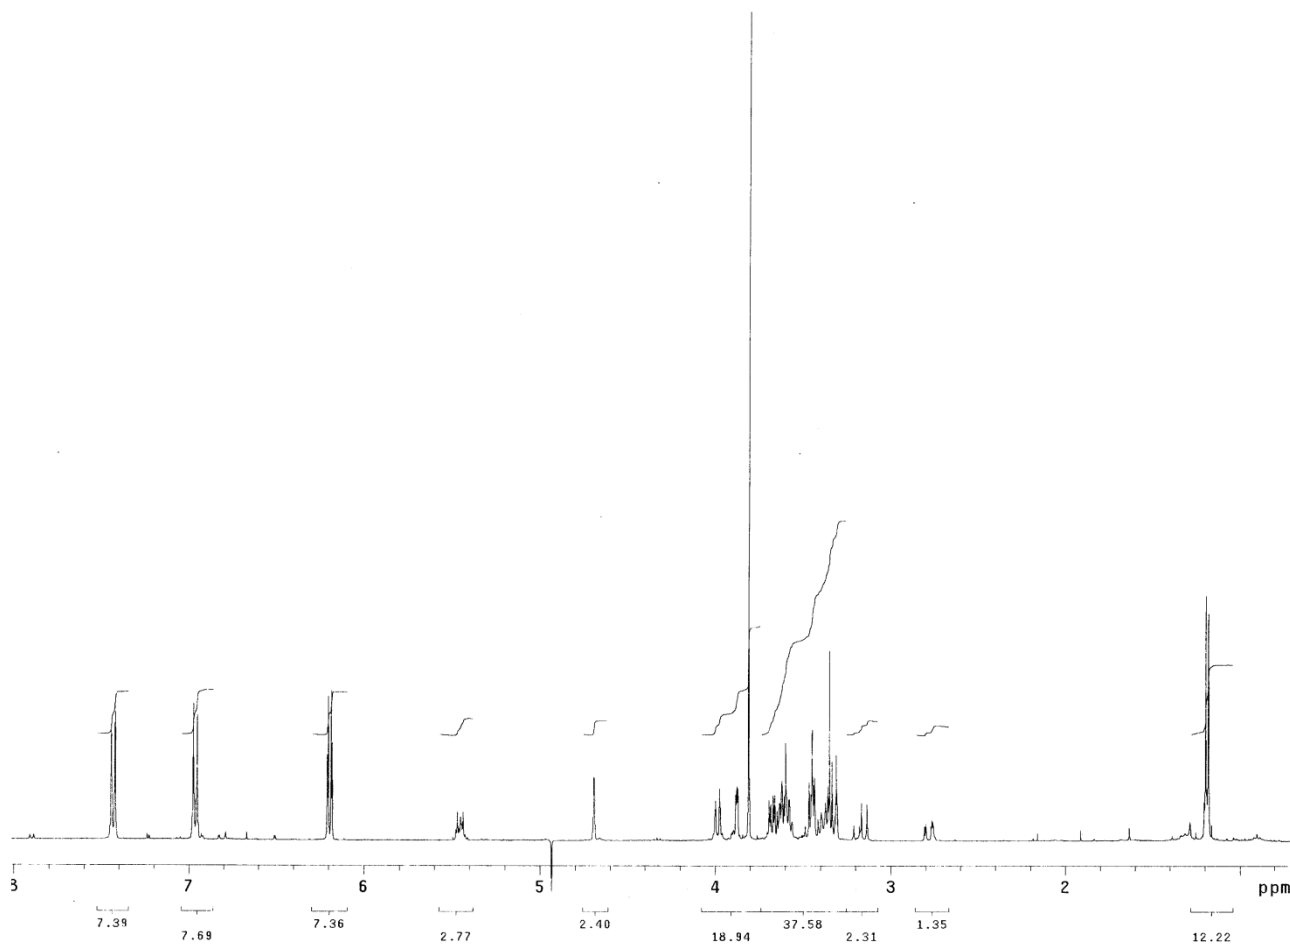

Figure S2.  $^1\text{H-NMR}$  ( $\text{CDCl}_3$ , 400MHz) compound 2a.

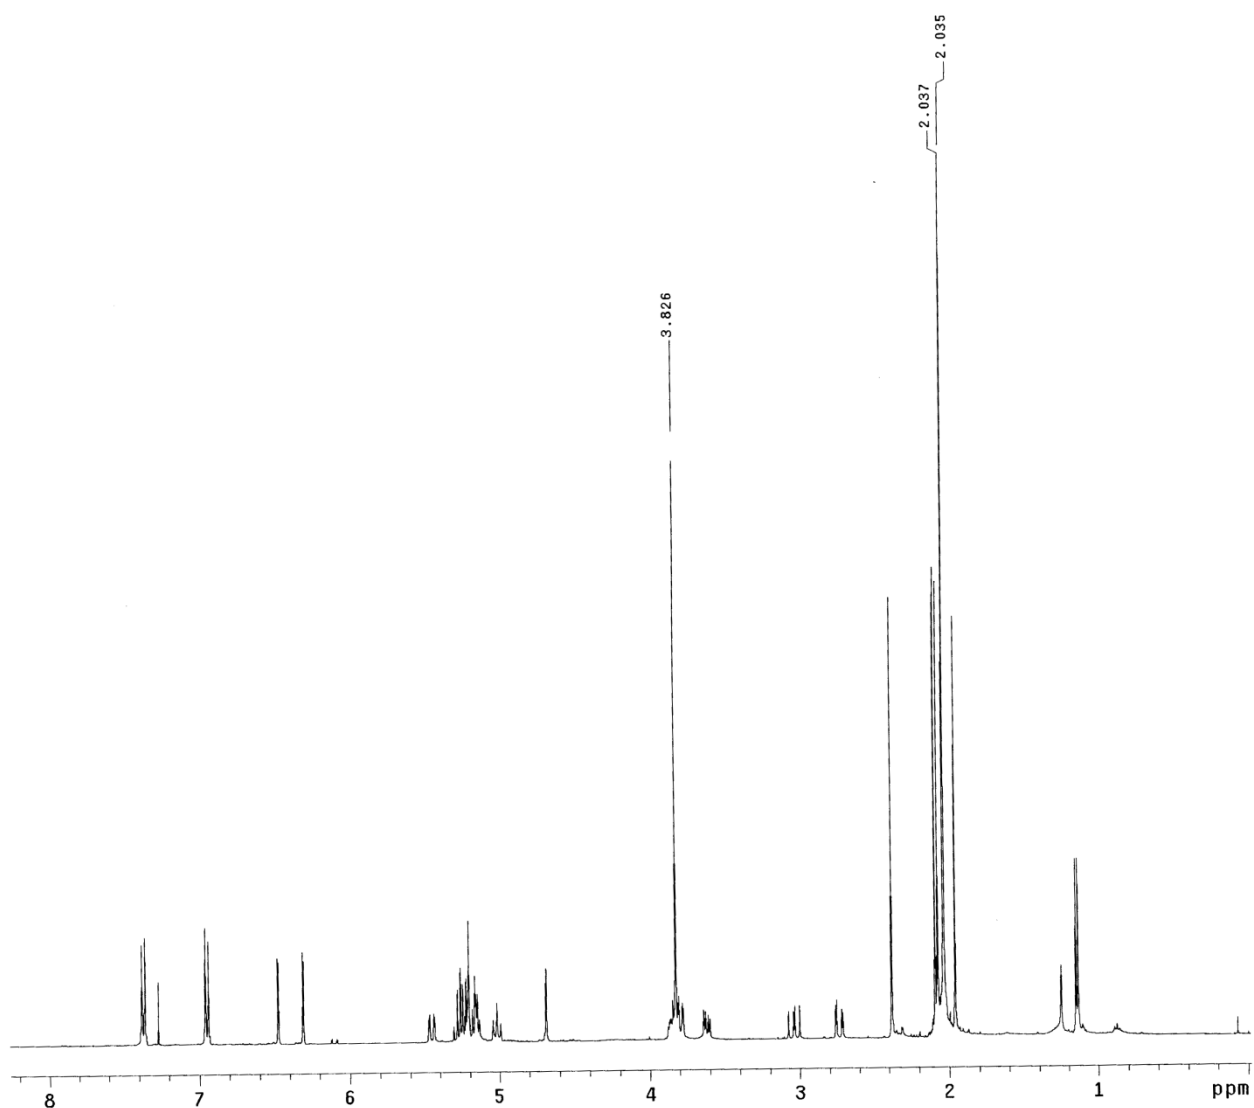

Figure S3.  $^{13}\text{C}$ -NMR ( $\text{CDCl}_3$ , 100MHz) compound 2a.

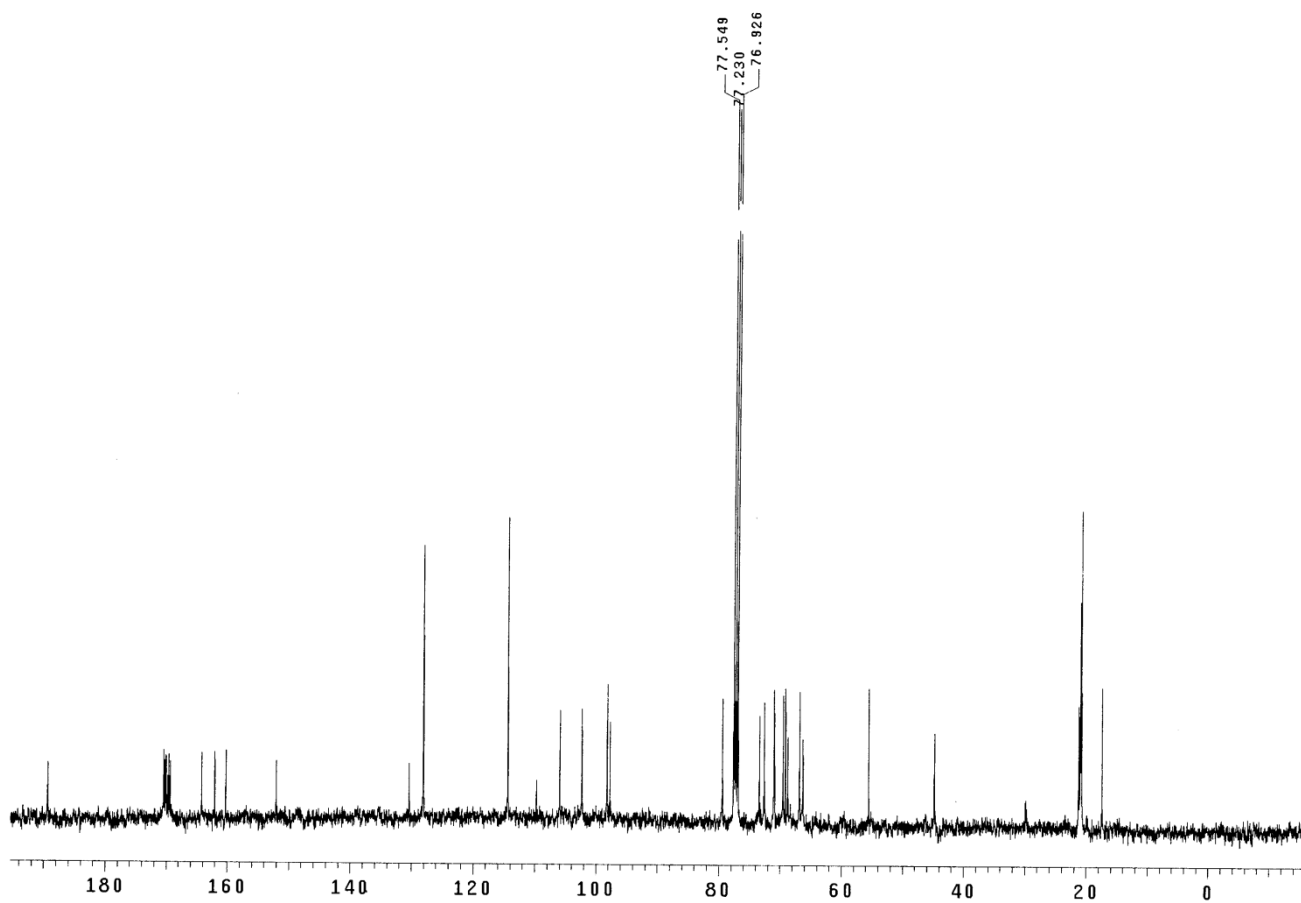

**Figure S4.**  $^1\text{H}$ - $^1\text{H}$  COSY ( $\text{CDCl}_3$ , 400MHz) compound 2a.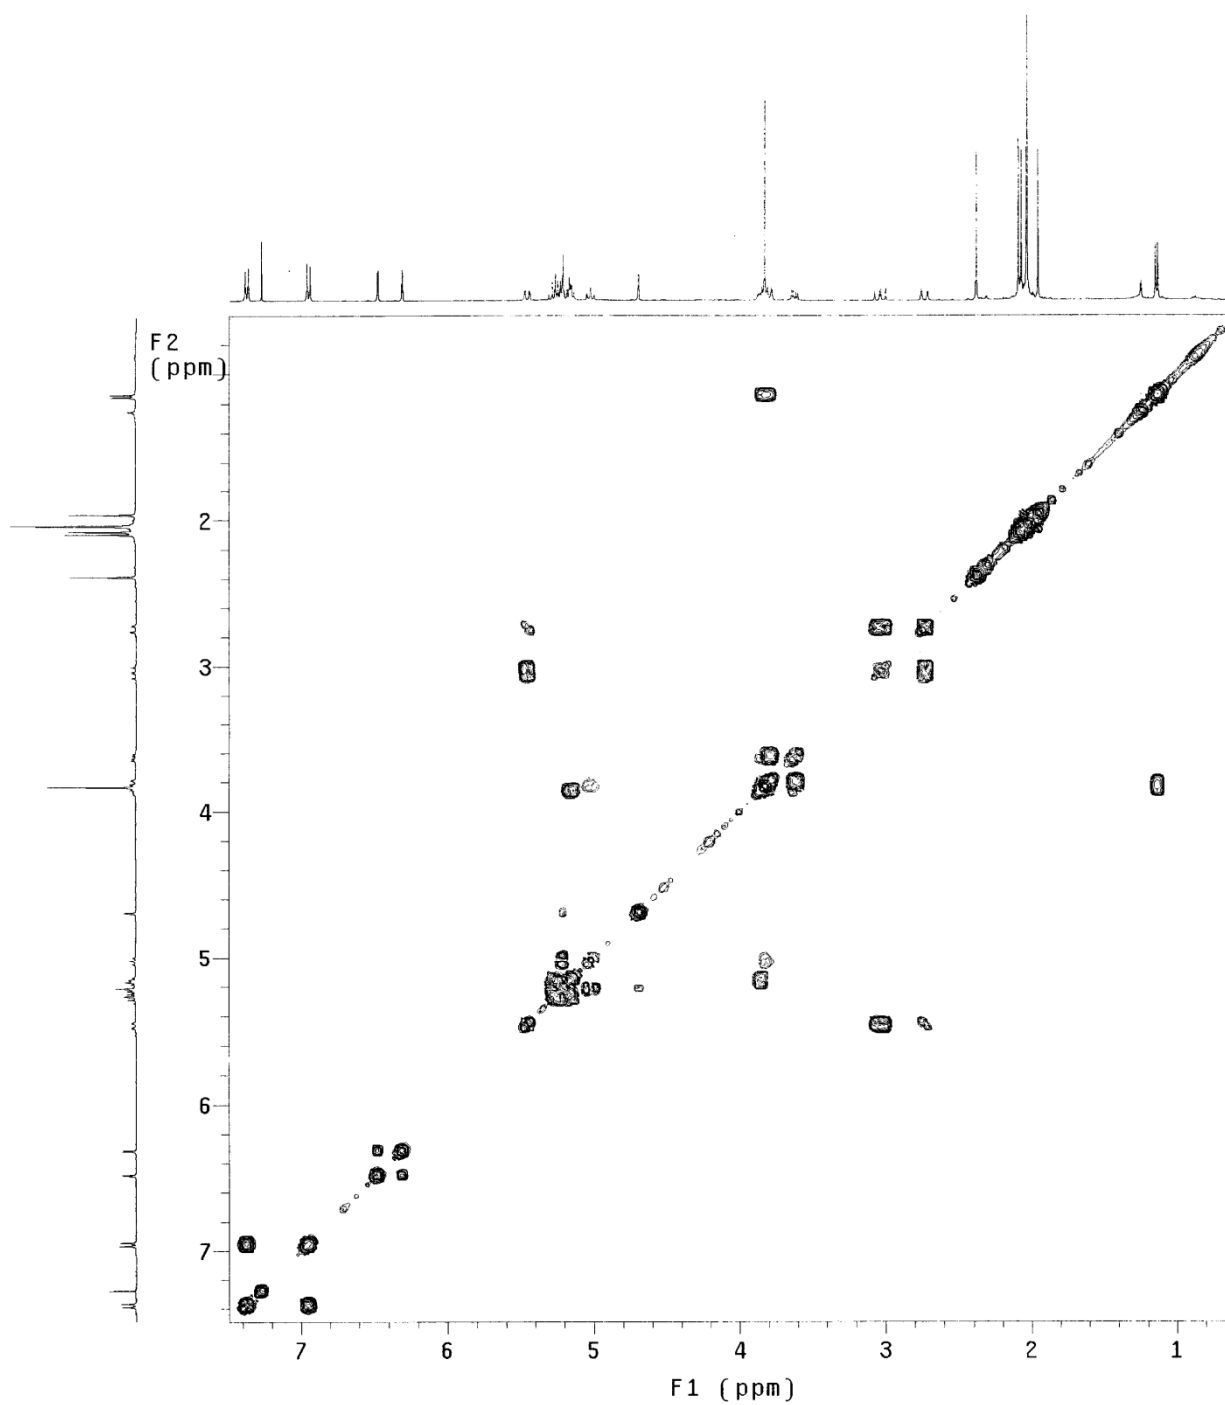

Figure S5. HSQC (CDCl<sub>3</sub>, 400MHz) compound 2a.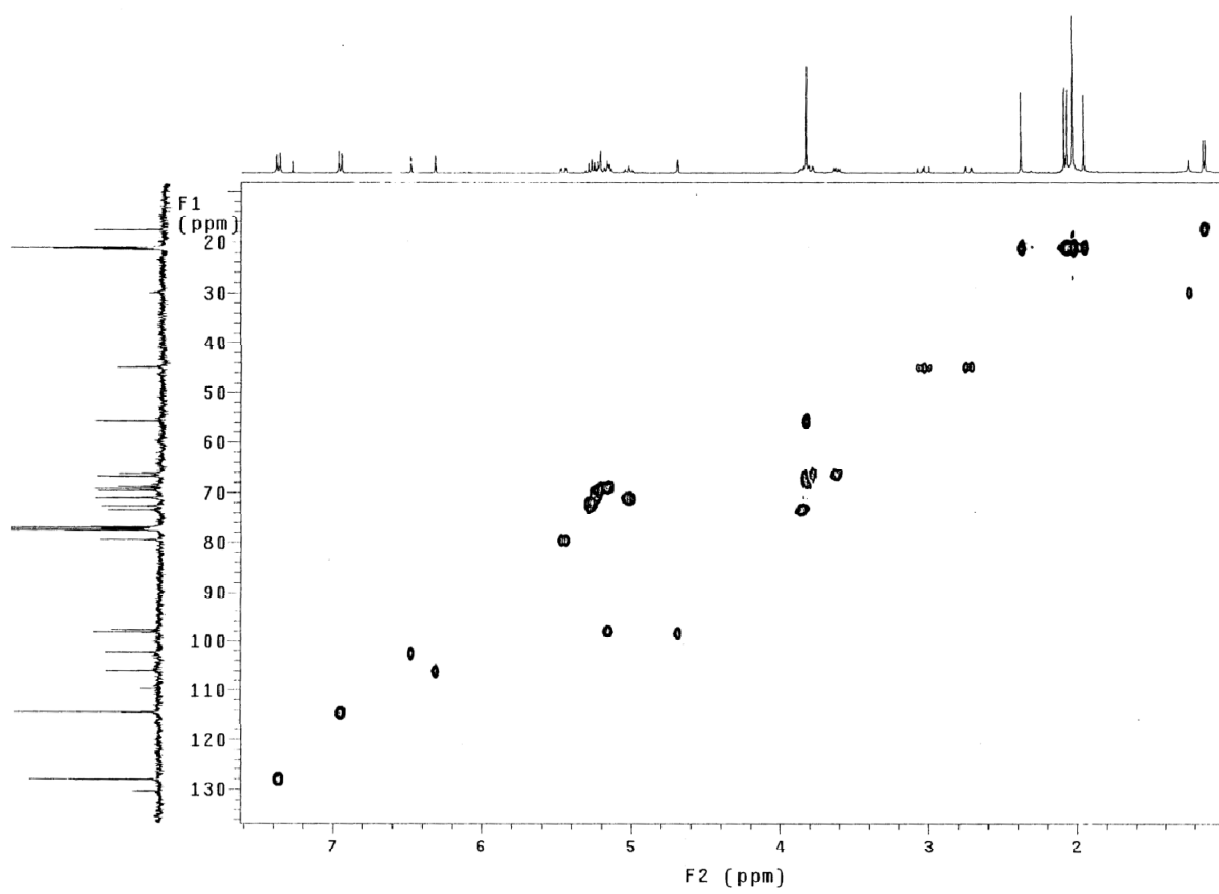

**Figure S6.** HMBC (CDCl<sub>3</sub>, 400MHz) compound 2a.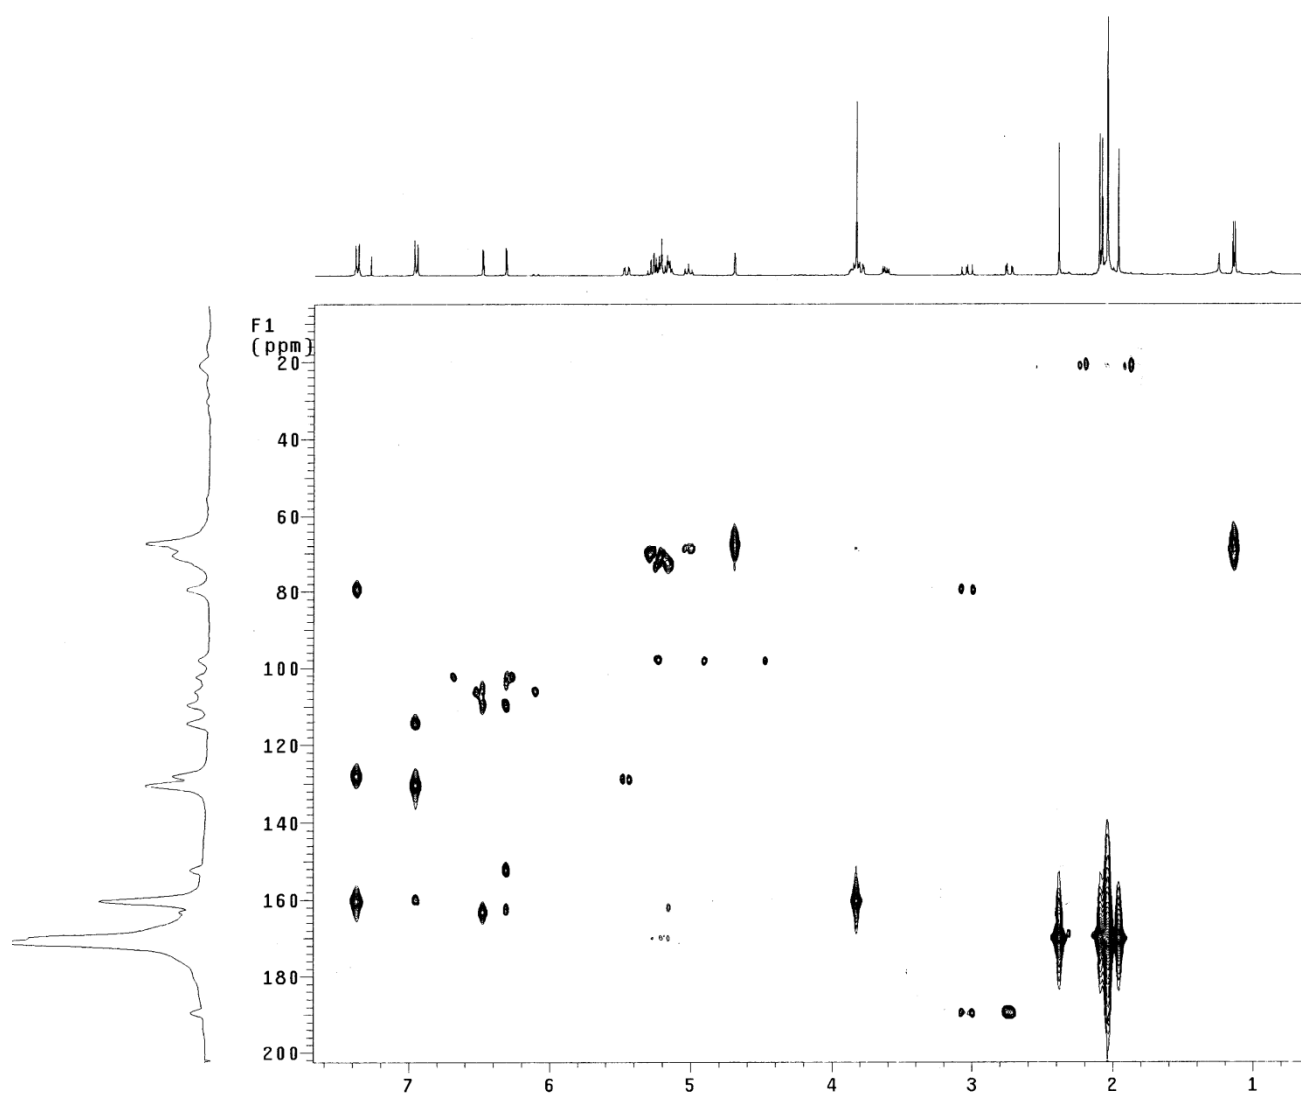

Figure S7. Mass spectra compound 2a.

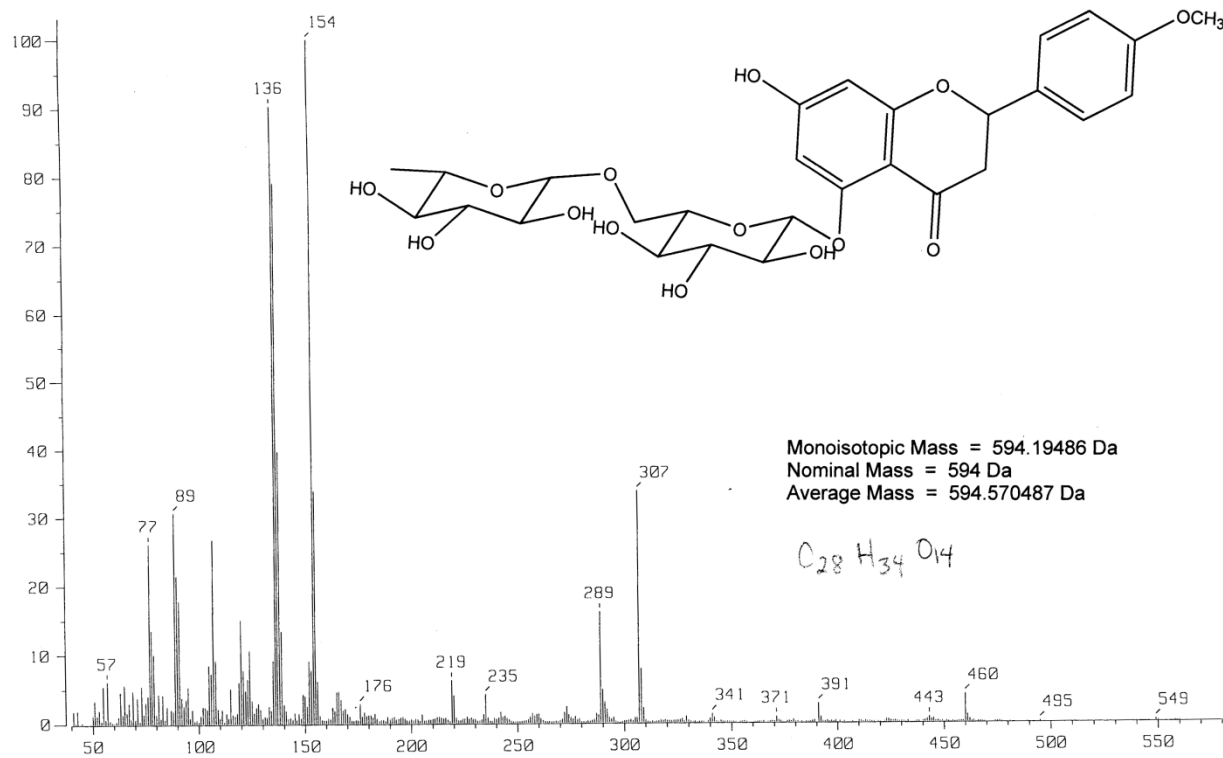

Supplement: molecules-18-13260-s001.pdf [file molecules-18-13260-s001.pdf]
